# Supplementary material for: Non-additive QTL mapping of lactation traits in 124,000 cattle reveals novel recessive loci
Source: PubMed Central journal article supplement (PMC8785530; doi:10.1186/s12711-021-00694-3), 2022-01-24

Iteration 0

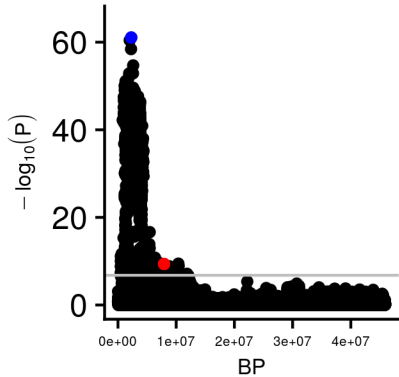

Iteration 1

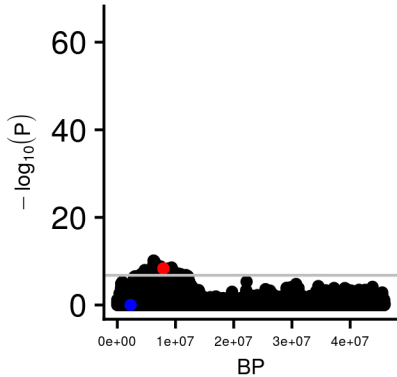

Iteration 2

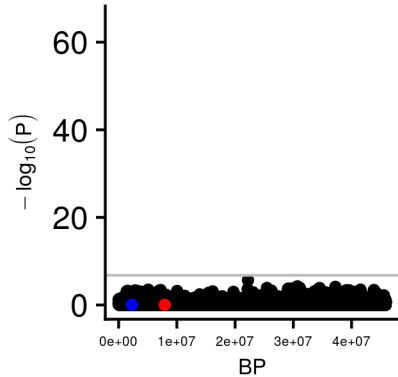

Supplement: 12711_2021_694_MOESM3_ESM.pdf [file 12711_2021_694_MOESM3_ESM.pdf]
